# Supplementary material for: Uridine attenuates obesity, ameliorates hepatic lipid accumulation and modifies the gut microbiota composition in mice fed with a high-fat diet
Source: Royal Society of Chemistry journal article supplement (doi:10.1039/d0fo02533j), 2021-01-01
Supplement: d0fo02533j1.pdf [file d0fo02533j1.pdf]

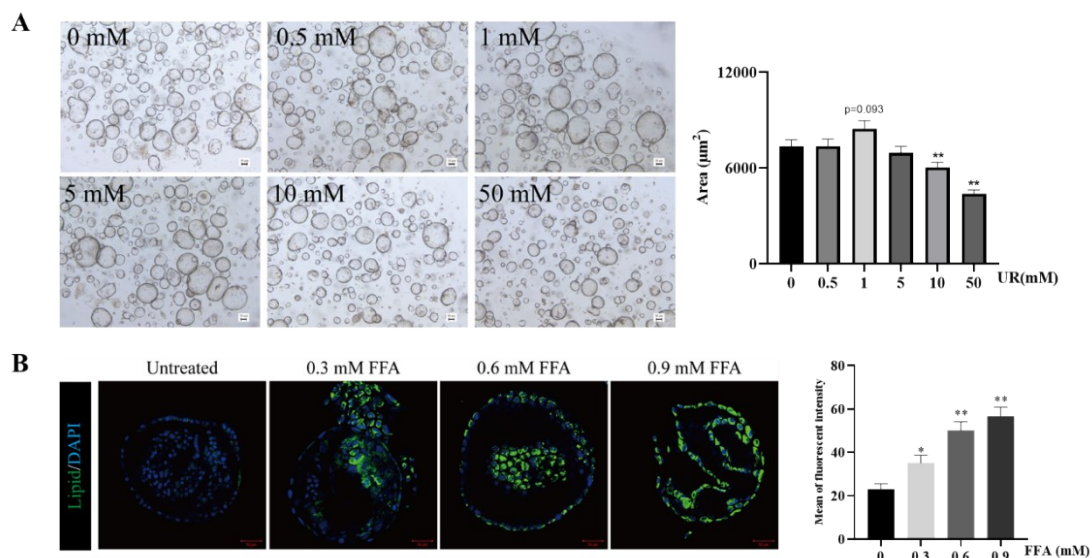

1

2 Supplement Fig. 1 Representative pictures and statistical results of morphology and  
3 area of liver organoids treated with treatment with different concentrations of uridine  
4 for 48 hours in expansion medium (A). The representative images of lipid fluorescent  
5 and mean fluorescent intensity of liver organoids treated with different concentrations  
6 of FFA for 24 hours after differentiation (B). Scale bar: 50 µm. \*  $P < 0.05$  and \*\*  $P <$   
7 0.01 compared to vehicle-treated cells.

8
